# Supplementary material for: Characterization of the stress degradation products of tolvaptan by UPLC-Q-TOF-MS/MS
Source: Royal Society of Chemistry journal article supplement (doi:10.1039/c4ra16644b), 2015-01-01
Supplement: c4ra16644b1.pdf [file c4ra16644b1.pdf]

**Table S1:** Parameters for linear regression equation

| Parameter                                 | Value          |
|-------------------------------------------|----------------|
| Calibration range                         | 25 – 200 µg/mL |
| Correlation coefficient (r <sup>2</sup> ) | 0.9992         |
| Slope                                     | 85338          |
| Intercept                                 | -59798         |
| SD of slope                               | 1224           |
| SD of intercept                           | 9353           |

**Table S2:** Accuracy and precision data

| Amount added | Accuracy                        | Precision |                     |                                          |                     |                     |
|--------------|---------------------------------|-----------|---------------------|------------------------------------------|---------------------|---------------------|
|              | Calculated spiked Concentration | Recovery  | Repeatability       | Intermediate precision                   |                     |                     |
|              |                                 |           |                     | Measured concentration (µg/mL) ± SD; RSD |                     |                     |
| (µg/mL)      | (µg/mL) ± SD; RSD               | (%)       | Intra-day precision | Inter-day precision                      | Analyst-I           | Analyst-II          |
| 50           | 49.94 ± 0.15; 0.29              | 99.89     | 50.04 ± 0.20; 0.41  | 49.89 ± 0.16; 0.33                       | 49.90 ± 0.28; 0.56  | 50.02 ± 0.19; 0.39  |
| 100          | 99.97 ± 0.14; 0.14              | 99.97     | 99.76 ± 0.42; 0.42  | 99.88 ± 0.23; 0.23                       | 100.11 ± 0.19; 0.19 | 99.85 ± 0.18; 0.18  |
| 150          | 150.10 ± 0.16; 0.11             | 100.07    | 150.35 ± 0.09; 0.06 | 150.10 ± 0.38; 0.25                      | 149.96 ± 0.30; 0.20 | 149.96 ± 0.30; 0.20 |
